# Supplementary material for: Prevalence of Thyroid Disease in Patients Surgically Treated for Pituitary Disease
Source: MDPI journal article supplement (doi:10.3390/jcm8081142), 2019-07-31
Supplement: s1 [file s1]

**Table S1.** Clinical characteristics of the study population according to the type of pituitary disease.

|                     | <b>Total</b>      | <b>NFPA</b>       | <b>GH</b>        | <b>PRL</b>       | <b>ACTH</b>      | <b>TSH</b>      | <b>RCC</b>      | <b>Cranio-pharyngioma</b> | <b>Others<sup>a</sup></b> | <b>p-value</b> |
|---------------------|-------------------|-------------------|------------------|------------------|------------------|-----------------|-----------------|---------------------------|---------------------------|----------------|
|                     | <b>(n = 2202)</b> | <b>(n = 1167)</b> | <b>(n = 488)</b> | <b>(n = 209)</b> | <b>(n = 121)</b> | <b>(n = 28)</b> | <b>(n = 92)</b> | <b>(n = 51)</b>           | <b>(n = 46)</b>           |                |
| Age                 | 45.0 ± 13.5       | 49.7 ± 12.7       | 44.0 ± 11.7      | 32.6 ± 8.4       | 39.7 ± 13.4      | 41.7 ± 8.5      | 38.0 ± 14.2     | 43.0 ± 14.4               | 51.6 ± 15.4               | <0.001         |
| Female, n (%)       | 1317 (59.8)       | 646 (55.4)        | 265 (54.3)       | 190 (90.9)       | 99 (81.8)        | 16 (57.1)       | 55 (59.8)       | 24 (47.1)                 | 22 (47.8)                 | <0.001         |
| Microadenoma, n (%) | 373 (16.9)        | 50 (4.3)          | 119 (24.4)       | 121 (57.9)       | 79 (65.3)        | 4 (14.3)        |                 |                           |                           | <0.001         |
| Macroadenoma, n (%) | 1640 (74.5)       | 1117 (95.7)       | 369 (75.6)       | 88 (42.1)        | 42 (34.7)        | 24 (85.7)       |                 |                           |                           |                |
| Others, n (%)       | 189 (8.6)         |                   |                  |                  |                  |                 | 92 (100.0)      | 51 (100.0)                | 46 (100.0)                |                |

Data are expressed as means ± standard deviations for normally distributed continuous variables and as numbers (%) for categorical variables Abbreviations: NFPA: nonfunctioning pituitary adenoma; GH: growth hormone-secreting pituitary adenoma (including GH and PRL co-secreting pituitary adenoma); PRL: prolactin-secreting pituitary adenoma; ACTH: adrenocorticotrophic hormone-secreting pituitary adenoma; TSH: thyroid-stimulating hormone-secreting pituitary adenoma (including GH and TSH co-secreting pituitary adenoma); RCC: Rathke's cleft cyst <sup>a</sup>Chordoma, tumors metastatic to the pituitary gland, lymphocytic hypophysitis, meningioma, germinoma, etc.

**Table S2.** Prevalence of patients undergoing treatment for hypothyroidism and hyperthyroidism in the general Korean population in 2015 (Adapted and modified from Kwon et al. Endocrinol Metab 2018; 33:260-267).

|       | Hyperthyroidism |      |        | Hypothyroidism |      |        |
|-------|-----------------|------|--------|----------------|------|--------|
|       | Total           | Male | Female | Total          | Male | Female |
| Total | 0.3             | 0.2  | 0.4    | 1.6            | 0.5  | 2.7    |
| ~39   | 0.2             | 0.1  | 0.2    | 0.5            | 0.2  | 0.9    |
| 40~59 | 0.4             | 0.3  | 0.5    | 2.3            | 0.7  | 4.0    |
| 60~   | 0.4             | 0.2  | 0.5    | 3.1            | 1.3  | 4.6    |

Values are expressed as percentages.
